# Supplementary material
Source: PubMed Central journal article supplement (PMC2657578)
Supplement: emboj2008308s3.pdf [file emboj2008308s3.pdf]

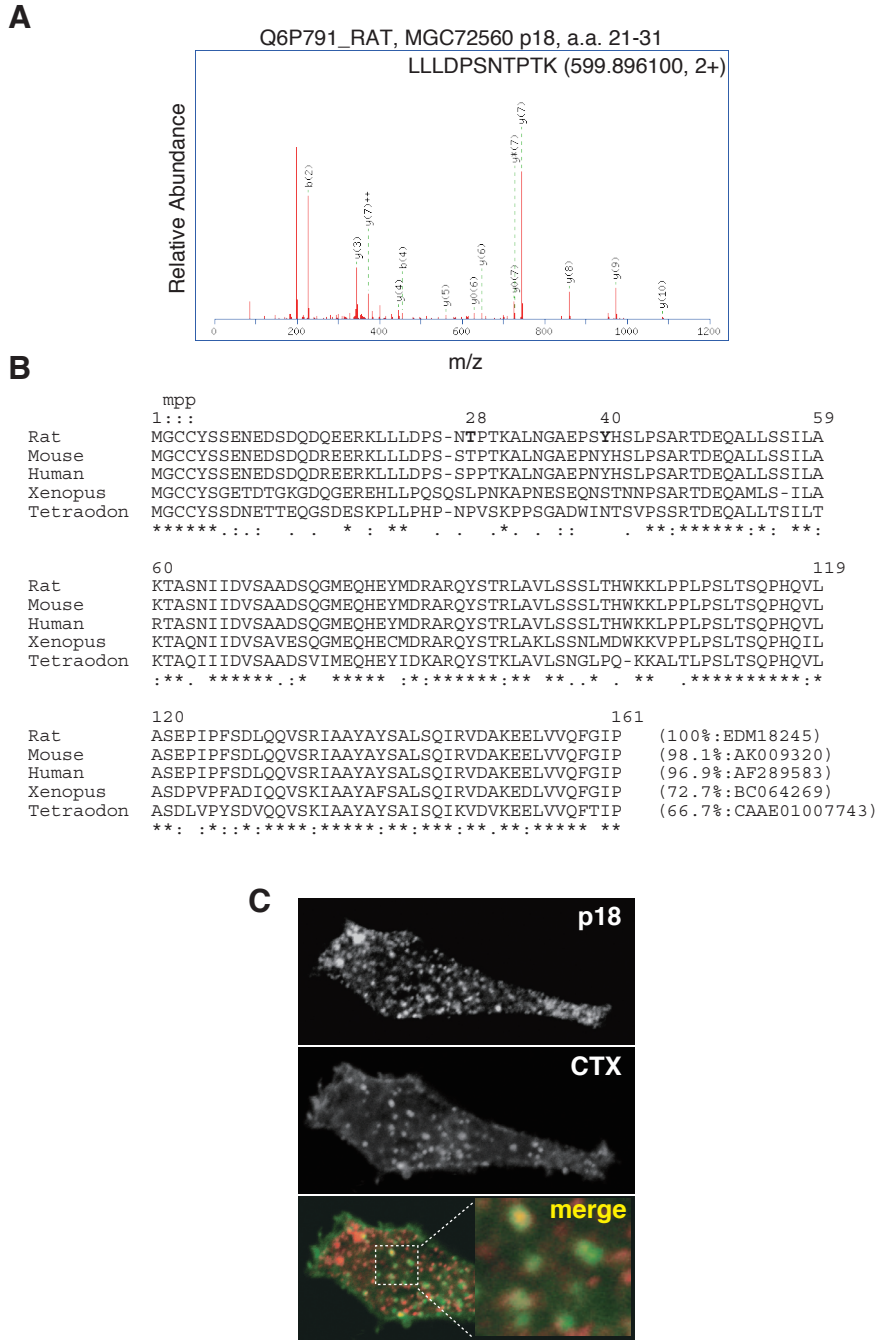

**Figure S1. Identification of p18**

(A) A representative MS/MS spectrum assigned to MGC72560. Peptide mass and valence are given in the parentheses following the peptide sequences. a.a.; amino acid number from the N- to C-terminus of the fragment. (B) Amino acid alignment of p18 from several vertebrates analyzed by Clustal W. Amino acid identity to rat p18 and accession numbers are shown in parentheses. (C) PC12 cells were stained with anti-p18 and CTX, and observed using a confocal laser-scanning microscope. An enlarged view of the white box is shown in the merged image.

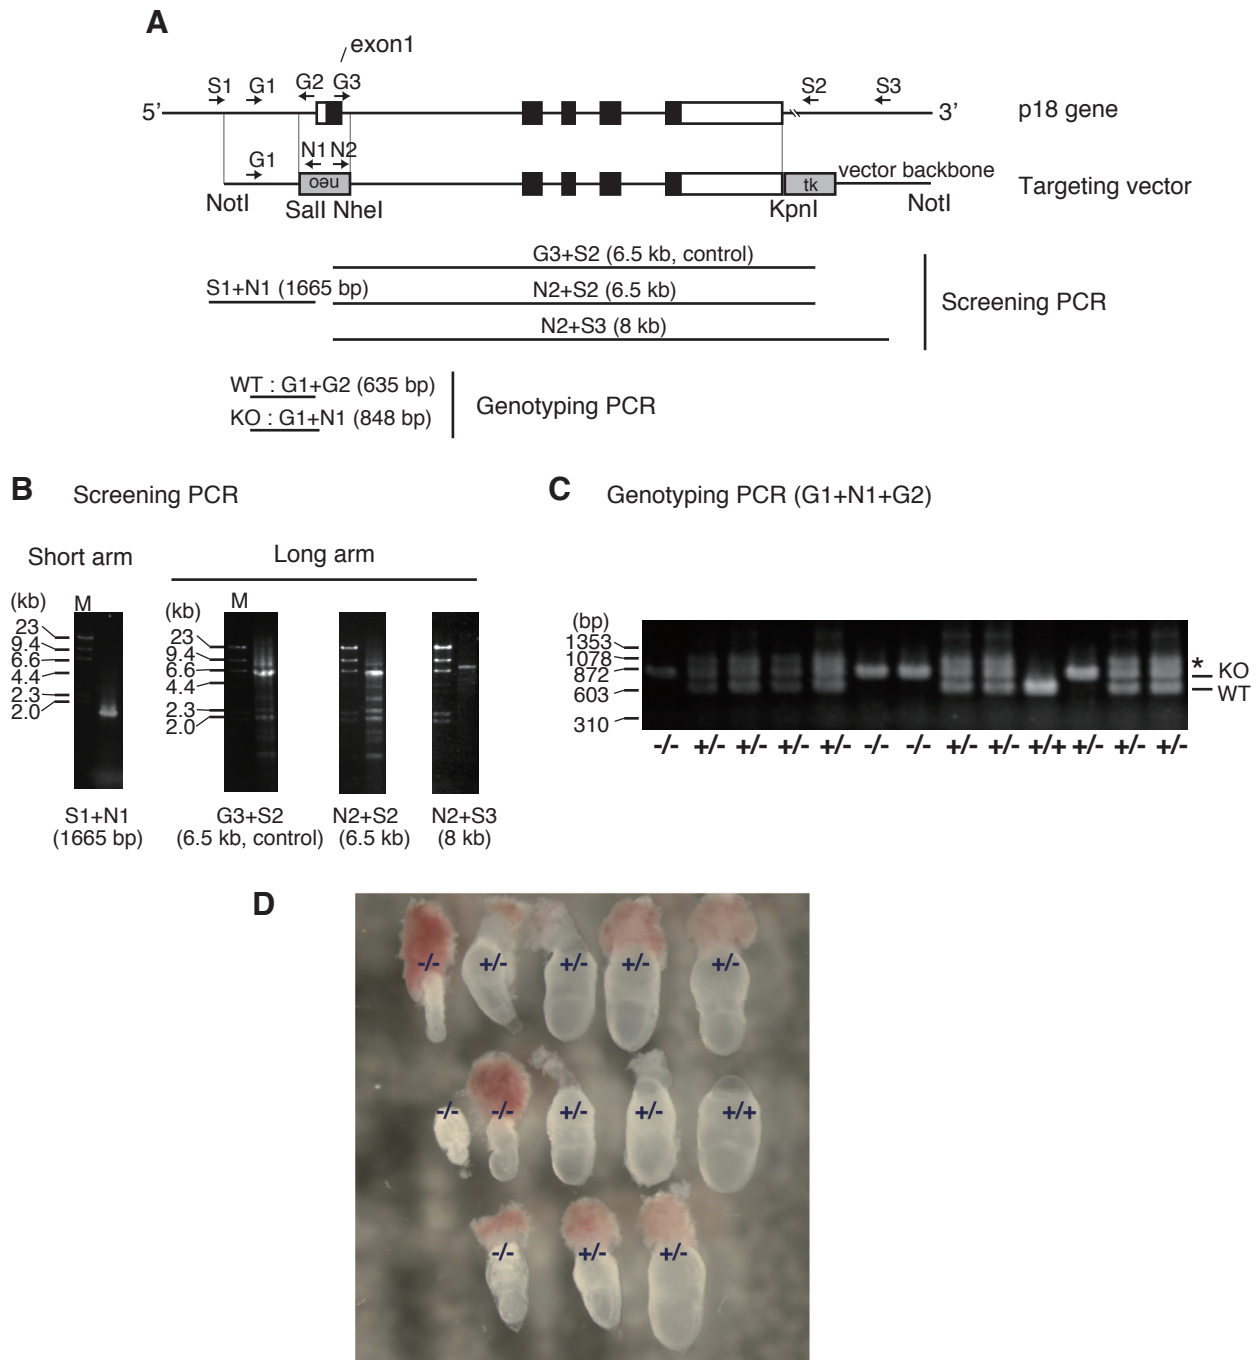

## Figure S2. Generation of p18 knockout mice

(A) Schematic diagram of the p18 gene and targeting vector containing the locations of PCR primer sequences designed for screening (S1-N1, G3-S2, N2-S2 and N2-S3) and genotyping (G1-G2 and G1-N1). The predicted sizes of PCR products are also shown. Primer sequences are: S1 (5' -TCT GCC CAG CTA CCT ATC CAA ACT GAA CAC), G1 (5' -AAG AGA AGT GTC TGC CAT CTG CCT ACT CAG), G2 (5' -GAC AAT CGC CAA CCA ATG GAA AAG TGC GTC), N1 (5' -GCC TTC TAT CGC CTT CTT GAC GAG TTC TTC), N2 (5' -TAC CCG GTA GAA TTG ACC TGC AG), G3 (5' -AAG GCT AGC CTA GTC TTA CTT CTG CCT AGG GT), S2 (5' -GAA GTA AAG AGT GGG CAG GAC AGA) and S3 (5' -CCT CCA TGG GAA CCC CAT AG). (B) A representative result of PCR screening of homologous recombinant. DNA marker sizes are shown on the left side of the panels. (C) PCR genotyping of a litter of E7 embryos obtained from an intercross of *p18*<sup>+/-</sup> mice. An asterisk shows non-specific band given by heterozygous embryos (+/-). Loss of p18 protein in *p18*<sup>-/-</sup> embryo was confirmed by immunofluorescence analysis of tissues (Fig.2 B). RT-PCR and immunoblot analyses of *p18*<sup>-/-</sup> cells also showed that the expression of p18 transcript and protein was completely ablated by gene targeting (Fig.S3). (D) Gross appearances of genotyped embryos from (C). Genotype is indicated on each embryo.

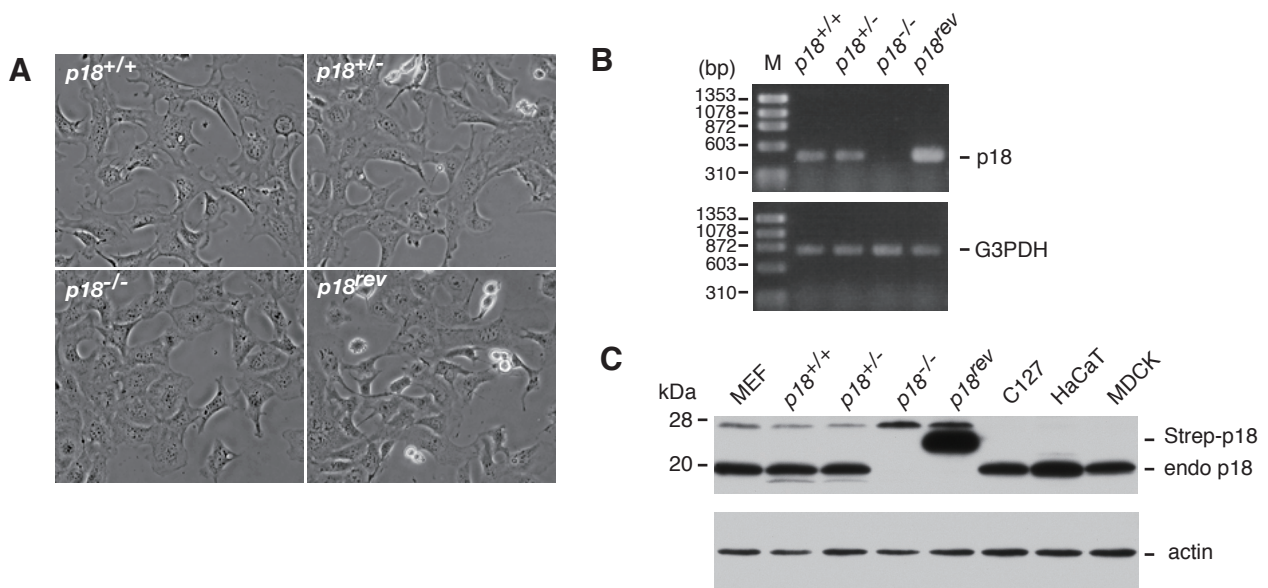

**Figure S3. Establishment *p18*<sup>-/-</sup> and *p18*<sup>rev</sup> cells**

(A) Phase contrast images of *p18*<sup>+/+</sup>, *p18*<sup>+/-</sup>, *p18*<sup>-/-</sup> and *p18*<sup>rev</sup> cells. (B) RT-PCR analysis of p18 expression. p18 transcripts were not detected in *p18*<sup>-/-</sup> cells. Transcripts of glyceraldehyde-3-phosphate dehydrogenase (G3PDH) were detected as an internal control. Primer sequences are: p18 forward (5' -ATG GGG TGC TGC TAT AGC AGC GAA), p18 reverse (5' -TCA TGG GAT CCC AAA CTG TAC AAC C), G3PDH forward (5' -ACT CCA CTC ACG GCA AAT TC) and G3PDH reverse (5' -CCC TGT TGC TGT AGC CGT AT). (C) Immunoblot analysis of p18 protein in the indicated cell lines. Locations of strep-tagged p18 (Strep-p18) and endogenous p18 (endo p18) are indicated. Expression of p18 protein was null in *p18*<sup>-/-</sup> cells. Actin was detected as loading control.

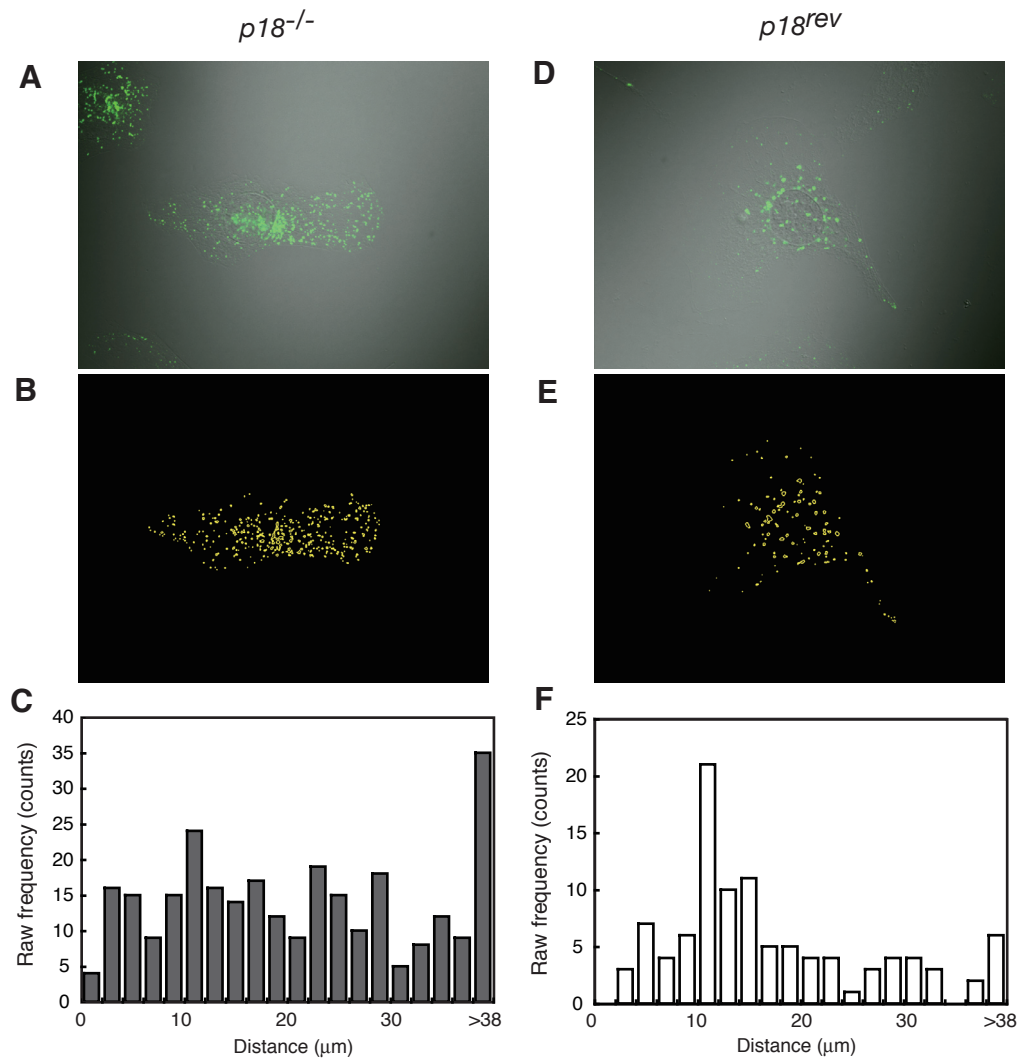

#### Figure S4. Analysis of LAMP-1 positive lysosome distribution

Analysis of LAMP-1 positive lysosome distribution with respect to the distance from the nucleus was performed essentially as described previously (Bohn et al, 2007). *p18<sup>-/-</sup>* (A-C) and *p18<sup>rev</sup>* (D-F) cells were stained with anti-LAMP-1, and DIC and fluorescence images were obtained by FV1000 laser-scanning microscope with 100x objective lens (Olympus) at 16-bit data depth (A and D). Images were processed with Metamorph software (Molecular Devices). The region of nucleus was traced manually from DIC images. For LAMP-1 images, 2D deconvolution was first applied, and LAMP-1 signals were identified by thresholding the signal intensity (B and E). The location of LAMP-1 positive vesicles was recorded by region measurement function, and the center position of each vesicle was defined as center (X,Y) = location (X,Y) + width (X,Y)/2. Distance from nucleus center was calculated by Pythagoras' theorem, and the results were binned in units of 2 μm in range of 0 to 40 μm (C and F). Totally, 17 *p18<sup>-/-</sup>* cells and 17 *p18<sup>rev</sup>* cells were processed. A  $\chi^2$  independence test was done on the original data (sum of all LAMP-1-positive vesicles per bin) for *p18<sup>-/-</sup>* vs *p18<sup>rev</sup>* cells, resulting in  $p < 0.001$ .

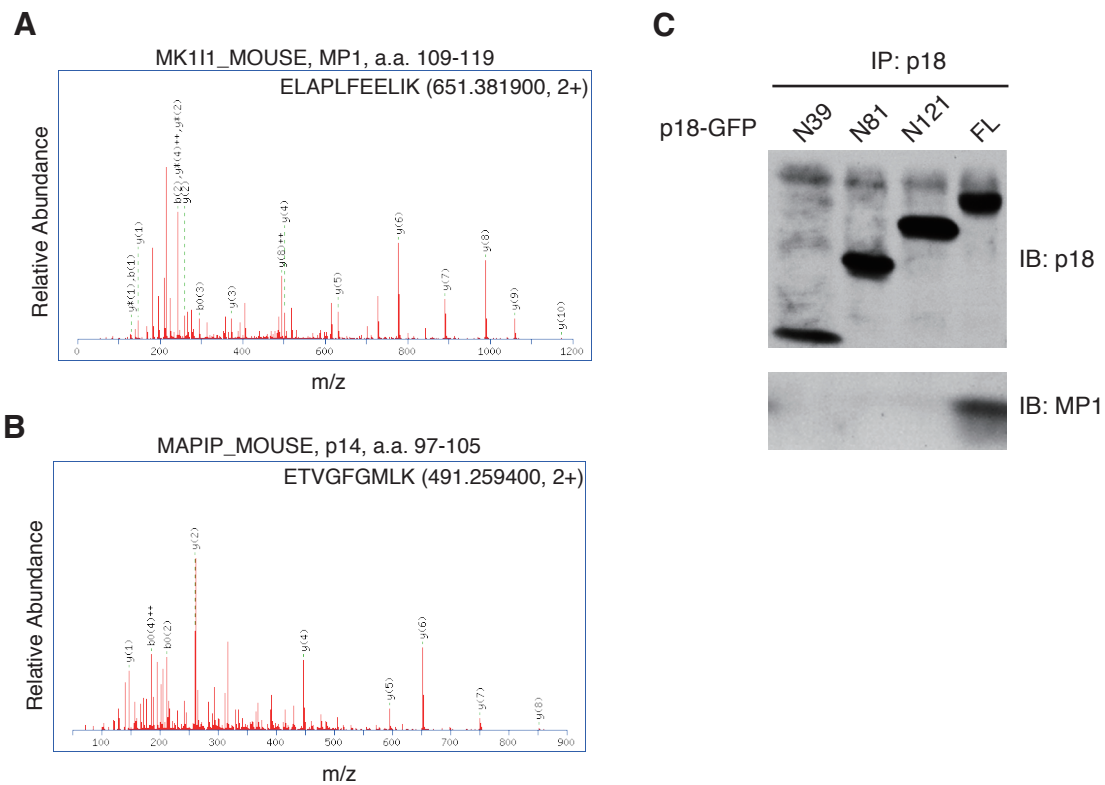

**Figure S5. Identification of p14 and MP1 as binding partners of p18**

(A and B) Representative MS/MS spectra assigned to MP1 (A) and p14 (B). (C) GFP fusion proteins containing a series of p18 deletion mutant (a.a. 1-39; p18N39, 1-81; p18N81, 1-121; p18N121, 6-161) and full length p18 (FL) were expressed in *p18*<sup>-/-</sup> cells, and immunoprecipitated with anti-GFP antibody, followed by immunoblotting with anti-p18 (upper panel) and anti-MP1 (lower panel) antibodies.

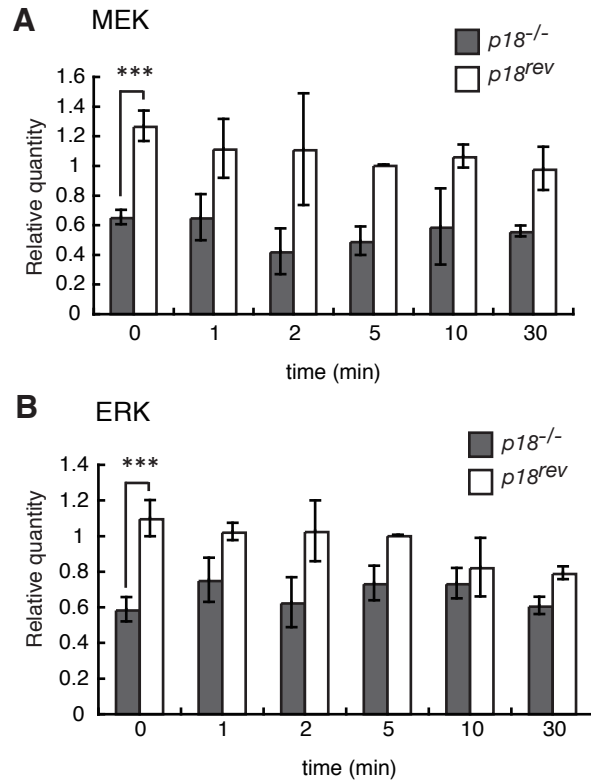

**Figure S6. p18-dependent distribution of MEK and ERK to DRMs**

$p18^{rev}$  and  $p18^{-/-}$  cells were stimulated with EGF, and the relative quantities of MEK (A) and ERK (B) in DRMs at the indicated time points were determined by immunoblotting. (A) Mean  $\pm$  S.D. of the relative quantities of MEK in DRM fractions of  $p18^{rev}$  (n=4, white) and  $p18^{-/-}$  (n=4, gray) cells are shown. Differences between groups were analyzed by using repeated measures analysis of variance (ANOVA); P=0.0068. Difference at the initial time point was analyzed by Student' s t-test; \*\*\*P< 0.001. (B) Mean  $\pm$  S.D. of the relative quantities of ERK in DRMs of  $p18^{rev}$  (n=4, white) and  $p18^{-/-}$  (n=4, gray) cells are shown. Differences between groups were analyzed by using repeated measures analysis of variance (ANOVA); P=0.0026. Difference at the initial time point was analyzed by Student' s t-test; \*\*\*P< 0.001.

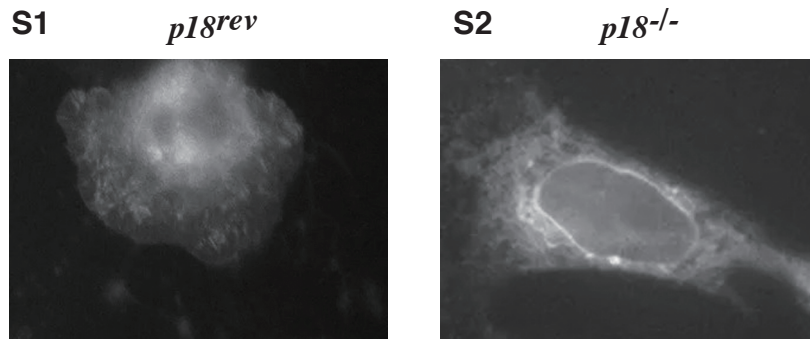

### Supplemental Movie Legends

#### Movie S1 and S2. Time-lapse images of integrin $\beta 1$ in *p18<sup>rev</sup>* and *p18<sup>-/-</sup>* cells

QuickTime movies of *p18<sup>rev</sup>* (S1) and *p18<sup>-/-</sup>* (S2) cells expressing integrin  $\beta 1$ -GFP.

In *p18<sup>-/-</sup>* cells, integrin  $\beta 1$  constitutively accumulates in endosomes and the endoplasmic reticulum, while *p18<sup>rev</sup>* cells actively transport integrin  $\beta 1$  to the cell periphery and focal adhesions.
